# Supplementary material for: Application of an unsteady state environmental distribution model to a decadal time series of PAH concentrations in Central Europe
Source: Royal Society of Chemistry journal article supplement (doi:10.1039/b815719g), 2009-01-01
Supplement: b815719g.pdf [file b815719g.pdf]

Physicochemical compound properties

|                       | Mr                  | C <sub>s</sub>    | P <sub>s</sub> | Log K <sub>ow</sub> | T <sub>0.5</sub> air | T <sub>0.5</sub> soil |
|-----------------------|---------------------|-------------------|----------------|---------------------|----------------------|-----------------------|
|                       | g mol <sup>-1</sup> | g m <sup>-3</sup> | Pa             |                     | h                    | h                     |
| acenaphthylene        | 150.2               | 16.1              | 0.9            | 4.000               | 55                   | 5500                  |
| acenaphthene          | 154.2               | 3.8               | 0.3            | 3.920               | 55                   | 5500                  |
| fluorene              | 166.2               | 1.9               | 0.09           | 4.180               | 55                   | 5500                  |
| phenanthrene          | 178.2               | 1.1               | 0.02           | 4.570               | 55                   | 5500                  |
| anthracene            | 178.2               | 0.045             | 0.001          | 4.540               | 55                   | 5500                  |
| fluoranthene          | 202.3               | 0.26              | 0.00123        | 5.220               | 170                  | 17000                 |
| pyrene                | 202.3               | 0.132             | 0.0006         | 5.180               | 170                  | 17000                 |
| benzo[a]anthracene    | 228.3               | 0.011             | 2.80E-05       | 5.910               | 170                  | 17000                 |
| chrysene              | 228.3               | 0.002             | 5.70E-07       | 5.860               | 170                  | 17000                 |
| benzo[b]fluoranthene  | 252.3               | 0.0015            | 5.00E-07       | 5.800               | 55                   | 17000                 |
| benzo[k]fluoranthene  | 252.3               | 0.0008            | 5.20E-08       | 6.000               | 170                  | 17000                 |
| benzo[a]pyrene        | 252.3               | 0.0038            | 7.00E-07       | 6.040               | 170                  | 17000                 |
| dibenzo[ah]anthracene | 278.4               | 0.0006            | 3.70E-10       | 6.750               | 170                  | 17000                 |
| benzo[ghi]perylene    | 268.4               | 0.00026           | 7.24E-08       | 6.500               | 170                  | 17000                 |

$M_r$  – molecular weight,  $C_s$  – water solubility,  $p_s$  – solid phase saturated vapour pressure,  $K_{ow}$  – octanol-water partitioning coefficient,  $T_{0.5}$  – half-life

Reference:

D. Mackay, W. Y. Shiu and K. C. Ma, *Illustrated handbook of physical-chemical properties and environmental fate for organic chemicals*. 1992, Lewis: Boca Raton, FL
